# Supplementary material for: Proliferative polyploid cells give rise to tumors via ploidy reduction
Source: PubMed Central journal article supplement (PMC7843634; doi:10.1038/s41467-021-20916-y), 2021-01-28
Supplement: 41467_2021_20916_MOESM3_ESM.pdf [file 41467_2021_20916_MOESM3_ESM.pdf]

## Reporting Summary

Nature Research wishes to improve the reproducibility of the work that we publish. This form provides structure for consistency and transparency in reporting. For further information on Nature Research policies, see [Authors & Referees](#) and the [Editorial Policy Checklist](#).

### Statistics

For all statistical analyses, confirm that the following items are present in the figure legend, table legend, main text, or Methods section.

n/a Confirmed

- |                                     |                                     |                                                                                                                                                                                                                                                            |
|-------------------------------------|-------------------------------------|------------------------------------------------------------------------------------------------------------------------------------------------------------------------------------------------------------------------------------------------------------|
| <input type="checkbox"/>            | <input checked="" type="checkbox"/> | The exact sample size ( $n$ ) for each experimental group/condition, given as a discrete number and unit of measurement                                                                                                                                    |
| <input type="checkbox"/>            | <input checked="" type="checkbox"/> | A statement on whether measurements were taken from distinct samples or whether the same sample was measured repeatedly                                                                                                                                    |
| <input type="checkbox"/>            | <input checked="" type="checkbox"/> | The statistical test(s) used AND whether they are one- or two-sided<br><i>Only common tests should be described solely by name; describe more complex techniques in the Methods section.</i>                                                               |
| <input checked="" type="checkbox"/> | <input type="checkbox"/>            | A description of all covariates tested                                                                                                                                                                                                                     |
| <input checked="" type="checkbox"/> | <input type="checkbox"/>            | A description of any assumptions or corrections, such as tests of normality and adjustment for multiple comparisons                                                                                                                                        |
| <input type="checkbox"/>            | <input checked="" type="checkbox"/> | A full description of the statistical parameters including central tendency (e.g. means) or other basic estimates (e.g. regression coefficient) AND variation (e.g. standard deviation) or associated estimates of uncertainty (e.g. confidence intervals) |
| <input type="checkbox"/>            | <input checked="" type="checkbox"/> | For null hypothesis testing, the test statistic (e.g. $F$ , $t$ , $r$ ) with confidence intervals, effect sizes, degrees of freedom and $P$ value noted<br><i>Give <math>P</math> values as exact values whenever suitable.</i>                            |
| <input checked="" type="checkbox"/> | <input type="checkbox"/>            | For Bayesian analysis, information on the choice of priors and Markov chain Monte Carlo settings                                                                                                                                                           |
| <input checked="" type="checkbox"/> | <input type="checkbox"/>            | For hierarchical and complex designs, identification of the appropriate level for tests and full reporting of outcomes                                                                                                                                     |
| <input checked="" type="checkbox"/> | <input type="checkbox"/>            | Estimates of effect sizes (e.g. Cohen's $d$ , Pearson's $r$ ), indicating how they were calculated                                                                                                                                                         |

*Our web collection on [statistics for biologists](#) contains articles on many of the points above.*

### Software and code

Policy information about [availability of computer code](#)

Data collection Zeiss Zen software (ver. 2.3 Blue edition, Carl Zeiss AG)

Data analysis R software (ver. 3.4.3, R Foundation for Statistical Computing); all codes used were based on commonly used formulas in R  
Microsoft Excel 2013 (ver. 15.0, Microsoft)  
Prism 7 (GraphPad Software, Inc.)  
FlowJo (ver. 10.6.0, TreeStar)  
GenomeStudio (ver. 2.0.5, Illumina)

For manuscripts utilizing custom algorithms or software that are central to the research but not yet described in published literature, software must be made available to editors/reviewers. We strongly encourage code deposition in a community repository (e.g. GitHub). See the Nature Research [guidelines for submitting code & software](#) for further information.

### Data

Policy information about [availability of data](#)

All manuscripts must include a [data availability statement](#). This statement should provide the following information, where applicable:

- Accession codes, unique identifiers, or web links for publicly available datasets
- A list of figures that have associated raw data
- A description of any restrictions on data availability

The authors declare that all data supporting the findings of this study are available within the article, its Extended Data, or from the corresponding author upon reasonable request.

## Field-specific reporting

Please select the one below that is the best fit for your research. If you are not sure, read the appropriate sections before making your selection.

- Life sciences     Behavioural & social sciences     Ecological, evolutionary & environmental sciences

For a reference copy of the document with all sections, see [nature.com/documents/nr-reporting-summary-flat.pdf](https://www.nature.com/documents/nr-reporting-summary-flat.pdf)

## Life sciences study design

All studies must disclose on these points even when the disclosure is negative.

|                 |                                                                                                                                                                                                                                                                                                                                                                                                                                                                  |
|-----------------|------------------------------------------------------------------------------------------------------------------------------------------------------------------------------------------------------------------------------------------------------------------------------------------------------------------------------------------------------------------------------------------------------------------------------------------------------------------|
| Sample size     | No statistical tests were used to determine sample size. Number of sample was determined based on experimental approach, availability, and feasibility required to obtain definitive results. Specifically, we utilized sample sizes previously described in the literature of similar experiments.                                                                                                                                                              |
| Data exclusions | No data was excluded.                                                                                                                                                                                                                                                                                                                                                                                                                                            |
| Replication     | All repeatable experiments are repeated 3 or more times. In experiments to analyze mice comprehensively, mice were analysed in 3 or more batches. All experiments were successfully reproduced.                                                                                                                                                                                                                                                                  |
| Randomization   | Mice were randomly allocated into experimental groups.                                                                                                                                                                                                                                                                                                                                                                                                           |
| Blinding        | In SNP array analysis, both bicolored and reporter-lost samples were analyzed at the same time without information on their reporter expressions, and detected allele imbalances were referred to their sample information later.<br>For other experiments, blinding was not conducted during experiments because each experiment was performed by a single investigator and because collected data were quantitative and not influenced by investigator's bias. |

## Reporting for specific materials, systems and methods

We require information from authors about some types of materials, experimental systems and methods used in many studies. Here, indicate whether each material, system or method listed is relevant to your study. If you are not sure if a list item applies to your research, read the appropriate section before selecting a response.

### Materials & experimental systems

| n/a                                 | Involved in the study                                           |
|-------------------------------------|-----------------------------------------------------------------|
| <input type="checkbox"/>            | <input checked="" type="checkbox"/> Antibodies                  |
| <input checked="" type="checkbox"/> | <input type="checkbox"/> Eukaryotic cell lines                  |
| <input checked="" type="checkbox"/> | <input type="checkbox"/> Palaeontology                          |
| <input type="checkbox"/>            | <input checked="" type="checkbox"/> Animals and other organisms |
| <input checked="" type="checkbox"/> | <input type="checkbox"/> Human research participants            |
| <input checked="" type="checkbox"/> | <input type="checkbox"/> Clinical data                          |

### Methods

| n/a                                 | Involved in the study                              |
|-------------------------------------|----------------------------------------------------|
| <input checked="" type="checkbox"/> | <input type="checkbox"/> ChIP-seq                  |
| <input type="checkbox"/>            | <input checked="" type="checkbox"/> Flow cytometry |
| <input checked="" type="checkbox"/> | <input type="checkbox"/> MRI-based neuroimaging    |

## Antibodies

### Antibodies used

anti-Pericentrin (abcam, ab4448)  
Alexa Fluor 647-conjugated anti-gamma Tubulin (abcam, ab191114)  
rat anti-Epcam (Becton Dickenson, 552370)  
rabbit anti-Fah (Overturf, K. et al. Nat Genet, 1996)  
Alexa Fluor 647-conjugated anti-rat (Jackson ImmunoResearch, 712-605-153)  
Alexa Fluor 647-conjugated anti-rabbit (Jackson ImmunoResearch, 711-605-152)  
Alexa Fluor 488-conjugated anti-rabbit (Jackson ImmunoResearch, 111-545-144)

### Validation

All commercially available antibodies are validated by suppliers as follows.  
<https://www.abcam.com/pericentrin-antibody-centrosome-marker-ab4448.html>  
<https://www.abcam.com/gamma-tubulin-antibody-tu-30-c-terminal-alexa-fluor-647-ab191114.html>  
<https://www.bdbiosciences.com/us/applications/research/stem-cell-research/cancer-research/human/purified-rat-anti-mouse-cd326-g88/p/552370>  
<https://www.jacksonimmuno.com/catalog/products/712-605-153>  
<https://www.jacksonimmuno.com/catalog/products/711-605-152>  
<https://www.jacksonimmuno.com/catalog/products/111-545-144>  
  
Rabbit anti-Fah is validated in the following paper and other researchers.  
Overturf, K. et al. Nat Genet. 1996;12:266-73. doi: 10.1038/ng0396-266

## Animals and other organisms

Policy information about [studies involving animals](#); [ARRIVE guidelines](#) recommended for reporting animal research

|                         |                                                                                                                                                                                                                                                                                                                                                                                                                                                                                                                                                                                                                                                                                                                                                                                                                                                                                                                                 |
|-------------------------|---------------------------------------------------------------------------------------------------------------------------------------------------------------------------------------------------------------------------------------------------------------------------------------------------------------------------------------------------------------------------------------------------------------------------------------------------------------------------------------------------------------------------------------------------------------------------------------------------------------------------------------------------------------------------------------------------------------------------------------------------------------------------------------------------------------------------------------------------------------------------------------------------------------------------------|
| Laboratory animals      | Ubc-CreERT2, Rosa-Confetti, Rosa-RGBow, Rosa-mTomato/mGFP (Rosa-mTmG), and Rosa-Cas9EGFP were obtained from The Jackson Laboratory, and maintained on the C57BL/6 background. Trp53 mutant mice were obtained from Dr. Allan Bradley (Department of Medicine, University of Cambridge) and maintained on the 129S4/SvJae background. GFP transgenic mice were obtained from Dr. Masaru Okabe (Osaka University). Fah <sup>-/-</sup> mice on either the C57BL/6 or the 129S4/SvJae background were generated in our laboratory and reported previously (Grompe, M. et al. Genes Dev, 1993). C57BL/6 wild-type mice were obtained from The Jackson Laboratory. 129S4/SvJae wild-type mice were obtained from Dr. Philippe M Soriano (Icahn School of Medicine at Mount Sinai). 5-12 week-old male and female Fah <sup>-/-</sup> mice were used as recipients. 6-20 week-old male and female mice were used for other experiments. |
| Wild animals            | No wild animals were used in this study.                                                                                                                                                                                                                                                                                                                                                                                                                                                                                                                                                                                                                                                                                                                                                                                                                                                                                        |
| Field-collected samples | No field-collected samples were used in this study.                                                                                                                                                                                                                                                                                                                                                                                                                                                                                                                                                                                                                                                                                                                                                                                                                                                                             |
| Ethics oversight        | The Oregon Health & Science University Institutional Animal Care and Use Committee (Portland, OR) approved all animal experiments described.                                                                                                                                                                                                                                                                                                                                                                                                                                                                                                                                                                                                                                                                                                                                                                                    |

Note that full information on the approval of the study protocol must also be provided in the manuscript.

## Flow Cytometry

### Plots

Confirm that:

- The axis labels state the marker and fluorochrome used (e.g. CD4-FITC).
- The axis scales are clearly visible. Include numbers along axes only for bottom left plot of group (a 'group' is an analysis of identical markers).
- All plots are contour plots with outliers or pseudocolor plots.
- A numerical value for number of cells or percentage (with statistics) is provided.

### Methodology

|                           |                                                                                                                                                                                                                                                                                                                   |
|---------------------------|-------------------------------------------------------------------------------------------------------------------------------------------------------------------------------------------------------------------------------------------------------------------------------------------------------------------|
| Sample preparation        | Primary hepatocytes were isolated by a two-step collagenase perfusion method <sup>46</sup> , and collected by sequential centrifugation at 50 g × 2 minutes.                                                                                                                                                      |
| Instrument                | FACS was performed with a Cytopeia inFluxV-GS (Becton Dickinson, Franklin Lakes, NJ) at a flow rate of about 1,000 cells/sec. Flow cytometric analysis was performed with a BDLSRFortessa (Becton Dickinson), BD FACSymphony (Becton Dickinson), or Cytoflex S (Beckman Coulter Life Sciences, Indianapolis, IN). |
| Software                  | Data were processed using FlowJo software (TreeStar).                                                                                                                                                                                                                                                             |
| Cell population abundance | The abundance of cells was dependent on experiments. More than 1 million hepatocytes were typically analyzed, and more than 50 thousands of viable fluorophore-positive cells were typically analyzed.                                                                                                            |
| Gating strategy           | Endogenous fluorophore-negative and fluorophore-positive cells were used to establish gates for each fraction. Gates were drawn to collect cells expressing either fluorophore. See the provided examples for gates used.                                                                                         |

Tick this box to confirm that a figure exemplifying the gating strategy is provided in the Supplementary Information.
